# Supplementary material for: Can the e-OAKHQOL be an alternative to measure health-related quality of life in knee osteoarthritis?
Source: Springer Nature journal article supplement (doi:10.1007/s11136-018-1914-4), 2018-06-12
Supplement: MOESM1 [file 15839378]

Title: Can the e-OAKHQOL be an alternative to measure health-related quality of life in knee osteoarthritis?

Quality of Life Research

Authors:

Maud Wieczorek a,b *, Christine Rotonda a,b, Jonathan Epstein a,b, Francis Guillemin a,b, Anne-Christine Rat a,b,c

a University of Lorraine, EA4360 Apemac, Faculty of Medicine, 9 avenue Forêt de Haye, F-54505 Vandoeuvre-lès-Nancy , France

b Inserm, CIC-1433 Epidémiologie Clinique, Hôpitaux de Brabois, Allée du Morvan, F-54500 Vandœuvre-lès-Nancy, France

c CHRU Nancy, Department of Rheumatology, Allée du Morvan, F- 54505 Vandoeuvre-lès-Nancy, France

* Corresponding author: Maud Wieczorek ([maud.wieczorek@univ-lorraine.fr](mailto:maud.wieczorek@univ-lorraine.fr))

**Appendix 1. Principal components analysis of residuals for each dimension of the e-OAKHQOL questionnaire**

Physical activity

Item Fact1 Fact2 Fact3 Fact4 Fact5 Fact6 Fact7 Fact8 Fact9 Fact10 Fact11 Fact12 Fact13 Fact14 Fact15 Fact16

I0001 0,121 -0,088 -0,078 -0,049 0,059 0,105 -0,103 0,012 -0,026 -0,062 0,955 0,064 -0,115 0,082 -0,061 0,000

I0002 0,057 -0,143 -0,011 -0,102 0,065 0,958 -0,081 0,057 -0,050 -0,049 0,105 0,045 -0,070 0,105 -0,014 0,000

I0003 0,099 -0,088 0,020 -0,133 0,063 0,057 -0,078 0,960 -0,045 -0,004 0,014 0,038 -0,113 0,084 -0,079 0,000

I0004 0,082 -0,075 -0,946 -0,040 0,102 0,012 -0,084 -0,021 -0,097 -0,085 0,082 0,147 -0,073 0,152 -0,005 0,000

I0005 0,078 -0,117 -0,149 -0,041 0,103 0,049 -0,095 0,041 -0,063 -0,055 0,068 0,945 -0,111 0,122 -0,039 0,000

I0006 -0,033 -0,035 0,078 -0,020 0,073 -0,078 0,958 -0,077 -0,133 -0,042 -0,098 -0,091 0,111 0,060 -0,055 0,000

I0007 -0,196 -0,061 0,077 0,008 0,041 -0,076 0,119 -0,125 -0,092 -0,101 -0,123 -0,120 0,929 0,058 -0,031 0,000

I0008 -0,934 -0,112 0,083 -0,001 0,051 -0,058 0,035 -0,106 -0,098 -0,126 -0,126 -0,082 0,194 0,071 -0,004 0,000

I0009 0,023 -0,144 0,025 0,134 -0,044 -0,035 -0,078 -0,106 0,012 -0,055 -0,084 -0,057 -0,050 0,190 0,942 0,000

I0010 0,000 -0,073 0,036 0,962 0,109 -0,097 -0,019 -0,129 -0,002 -0,024 -0,045 -0,038 0,009 0,091 0,133 0,000

I0011 0,250 -0,201 0,262 -0,109 0,338 -0,277 -0,211 -0,269 -0,207 -0,136 -0,305 -0,179 -0,284 0,167 -0,463 0,000

I0012 0,088 -0,059 0,090 -0,003 -0,059 -0,047 -0,130 -0,043 0,965 0,094 -0,022 -0,059 -0,079 0,077 0,028 0,000

I0013 0,109 -0,096 0,076 -0,024 -0,042 -0,044 -0,039 -0,001 0,092 0,972 -0,055 -0,050 -0,085 0,016 -0,037 0,000

I0014 0,053 -0,080 0,102 -0,114 -0,962 -0,068 -0,078 -0,067 0,055 0,039 -0,060 -0,104 -0,040 0,059 0,057 0,000

I0015 0,115 0,925 0,078 -0,083 0,083 -0,156 -0,039 -0,096 -0,067 -0,113 -0,093 -0,126 -0,059 -0,120 -0,131 0,000

I0016 0,074 0,123 0,164 -0,105 0,061 -0,116 -0,068 -0,093 -0,089 -0,020 -0,087 -0,133 -0,058 -0,917 -0,182 0,000

Mental health

Item Fact1 Fact2 Fact3 Fact4 Fact5 Fact6 Fact7 Fact8 Fact9 Fact10 Fact11 Fact12 Fact13

I0001 -0,047 -0,132 0,021 0,002 -0,043 -0,001 0,018 0,015 0,985 0,079 0,038 -0,016 -0,001

I0002 0,234 -0,120 0,065 0,128 -0,032 -0,034 -0,061 -0,098 -0,021 0,126 -0,092 0,933 0,001

I0003 0,931 -0,102 0,069 0,121 -0,051 -0,042 -0,051 -0,094 -0,060 0,123 -0,118 0,233 0,001

I0004 -0,030 -0,067 0,019 0,020 -0,031 0,993 -0,027 -0,053 0,000 0,038 0,020 -0,026 -0,001

I0005 -0,058 -0,118 -0,968 0,025 -0,022 -0,021 -0,026 -0,098 -0,022 0,065 0,158 -0,055 -0,001

I0006 -0,104 -0,125 -0,157 -0,018 0,011 0,019 -0,001 -0,052 0,039 0,037 0,967 -0,083 0,000

I0007 -0,037 -0,079 0,019 0,051 0,992 -0,031 -0,047 0,005 -0,041 0,021 0,013 -0,023 -0,001

I0008 -0,079 -0,095 0,097 0,046 0,003 -0,058 -0,034 0,979 0,014 0,033 -0,049 -0,085 0,000

I0009 -0,038 -0,086 0,024 0,012 -0,048 -0,027 0,992 -0,031 0,018 0,016 0,001 -0,048 -0,001

I0010 -0,100 -0,050 0,025 -0,979 -0,055 -0,022 -0,013 -0,045 -0,002 -0,101 0,019 -0,109 -0,001

I0011 -0,103 -0,025 0,064 -0,103 -0,023 -0,041 -0,017 -0,032 -0,081 -0,975 -0,033 -0,108 -0,001

I0012 -0,096 0,938 0,130 0,055 -0,094 -0,079 -0,101 -0,105 -0,152 0,028 -0,133 -0,115 -0,001

I0013 -0,344 -0,250 0,271 0,281 -0,249 -0,266 -0,266 -0,304 -0,279 0,272 -0,318 -0,324 0,112

Pain

Item Fact1 Fact2 Fact3 Fact4

I0001 -0,961 -0,272 0,051 0,032

I0002 -0,101 -0,231 0,968 -0,008

I0003 0,710 -0,284 -0,583 0,275

I0004 0,131 0,978 -0,160 -0,033

Social functioning

Item Fact1 Fact2 Fact3

I0001 0,398 -0,353 0,847

I0002 0,261 0,927 -0,271

I0003 -0,882 -0,309 -0,356

Social support

Item Fact1 Fact2 Fact3 Fact4

I0001 -0,647 -0,139 0,718 0,214

I0002 -0,224 0,955 0,195 -0,023

I0003 0,919 -0,371 -0,133 0,021

I0004 0,098 -0,372 -0,922 0,047
