# Supplementary material for: Can the e-OAKHQOL be an alternative to measure health-related quality of life in knee osteoarthritis?
Source: Springer Nature journal article supplement (doi:10.1007/s11136-018-1914-4), 2018-06-12
Supplement: MOESM2 [file 15839378]

Title: Can the e-OAKHQOL be an alternative to measure health-related quality of life in knee osteoarthritis?

Quality of Life Research

Authors:

Maud Wieczorek a,b *, Christine Rotonda a,b, Jonathan Epstein a,b, Francis Guillemin a,b, Anne-Christine Rat a,b,c

a University of Lorraine, EA4360 Apemac, Faculty of Medicine, 9 avenue Forêt de Haye, F-54505 Vandoeuvre-lès-Nancy , France

b Inserm, CIC-1433 Epidémiologie Clinique, Hôpitaux de Brabois, Allée du Morvan, F-54500 Vandœuvre-lès-Nancy, France

c CHRU Nancy, Department of Rheumatology, Allée du Morvan, F- 54505 Vandoeuvre-lès-Nancy, France

* Corresponding author: Maud Wieczorek ([maud.wieczorek@univ-lorraine.fr](mailto:maud.wieczorek@univ-lorraine.fr))

Appendix 2. Threshold estimates for items of the e-OAKHQOL questionnaire that had disordered thresholds

|  | Item thresholds | | | | | | | | | |
| --- | --- | --- | --- | --- | --- | --- | --- | --- | --- | --- |
|  | **1** | **2** | **3** | **4** | **5** | **6** | **7** | **8** | **9** | **10** |
| Physical activity |  |  |  |  |  |  |  |  |  |  |
| “Need a stick to walk” | -2.001 | -0.718 | 0.042 | 0.398 | 0.469 | 0.375 | 0.235 | 0.169 | 0.296 | 0.736 |
| “Need help” | -3.110 | -1.253 | -0.158 | 0.361 | 0.489 | 0.411 | 0.314 | 0.383 | 0.803 | 1.760 |
| Mental health |  |  |  |  |  |  |  |  |  |  |
| “Feel depressed because of pain” | -3.175 | -1.409 | -0.375 | 0.119 | 0.263 | 0.248 | 0.264 | 0.502 | 1.154 | 2.409 |
| "Embarrassed when people see me” | -3.179 | -1.279 | -0.198 | 0.276 | 0.355 | 0.253 | 0.181 | 0.350 | 0.975 | 2.267 |
| “Worry” | -2.450 | -1.109 | -0.339 | 0.018 | 0.114 | 0.106 | 0.147 | 0.393 | 1.000 | 2.120 |
| “Feel depressed” | -3.476 | -1.237 | 0.010 | 0.519 | 0.542 | 0.329 | 0.133 | 0.207 | 0.802 | 2.170 |
| “Feel older than my years” | -2.869 | -1.272 | -0.323 | 0.145 | 0.294 | 0.288 | 0.291 | 0.468 | 0.982 | 1.996 |
| “Wonder what is going to happen” | -2.781 | -1.098 | -0.169 | 0.208 | 0.236 | 0.118 | 0.058 | 0.258 | 0.921 | 2.250 |
| “Feel aggressive and irritable” | -4.775 | -1.815 | -0.117 | 0.632 | 0.748 | 0.545 | 0.338 | 0.440 | 1.168 | 2.834 |
| “Feel being a burden to close relatives” | -3.772 | -1.572 | -0.277 | 0.338 | 0.498 | 0.430 | 0.358 | 0.509 | 1.108 | 2.380 |
| “Worried about side effects of treatments” | -2.728 | -1.122 | -0.201 | 0.213 | 0.297 | 0.226 | 0.179 | 0.332 | 0.861 | 1.944 |
| “Feel embarrassed to ask for help” | -2.695 | -1.166 | -0.292 | 0.104 | 0.194 | 0.153 | 0.157 | 0.378 | 0.993 | 2.174 |
| Pain |  |  |  |  |  |  |  |  |  |  |
| “Wake up at night because of pain” | -4.504 | -1.946 | -0.394 | 0.392 | 0.654 | 0.635 | 0.575 | 0.716 | 1.301 | 2.571 |
| Social support |  |  |  |  |  |  |  |  |  |  |
| “Feel support from people close to me” | -2.216 | -1.013 | -0.358 | -0.090 | -0.049 | -0.073 | -0.001 | 0.327 | 1.073 | 2.399 |
| Social functioning |  |  |  |  |  |  |  |  |  |  |
| “Able to plan for the future” | -2.176 | -0.950 | -0.314 | -0.090 | -0.100 | -0.166 | -0.110 | 0.247 | 1.083 | 2.576 |
| “Going out whenever would like” | -2.266 | -1.060 | -0.390 | -0.100 | -0.034 | -0.038 | 0.046 | 0.372 | 1.096 | 2.374 |
| “Have friends whenever would like” | -2.070 | -0.928 | -0.300 | -0.039 | 0.003 | -0.026 | 0.022 | 0.294 | 0.940 | 2.106 |
