# Supplementary material for: Can the e-OAKHQOL be an alternative to measure health-related quality of life in knee osteoarthritis?
Source: Springer Nature journal article supplement (doi:10.1007/s11136-018-1914-4), 2018-06-12
Supplement: MOESM3 [file 15840886]

Title: Can the e-OAKHQOL be an alternative to measure health-related quality of life in knee osteoarthritis?

Quality of Life Research

Authors:

Maud Wieczorek a,b *, Christine Rotonda a,b, Jonathan Epstein a,b, Francis Guillemin a,b, Anne-Christine Rat a,b,c

a University of Lorraine, EA4360 Apemac, Faculty of Medicine, 9 avenue Forêt de Haye, F-54505 Vandoeuvre-lès-Nancy , France

b Inserm, CIC-1433 Epidémiologie Clinique, Hôpitaux de Brabois, Allée du Morvan, F-54500 Vandœuvre-lès-Nancy, France

c CHRU Nancy, Department of Rheumatology, Allée du Morvan, F- 54505 Vandoeuvre-lès-Nancy, France

* Corresponding author: Maud Wieczorek ([maud.wieczorek@univ-lorraine.fr](mailto:maud.wieczorek@univ-lorraine.fr))

Appendix 3


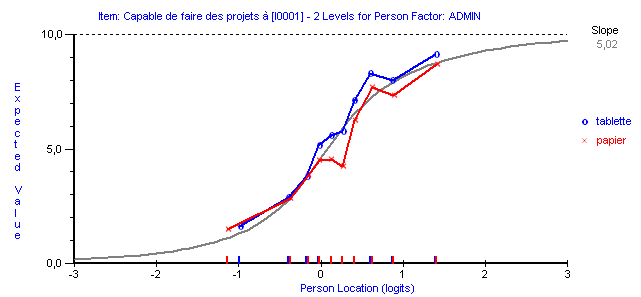


**Tablet**

**Paper**

**Item 30: Able to plan for the future**


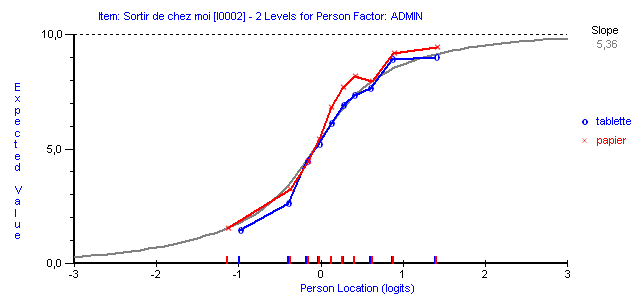


**Tablet**

**Paper**

**Item 31: Going out whenever would like**


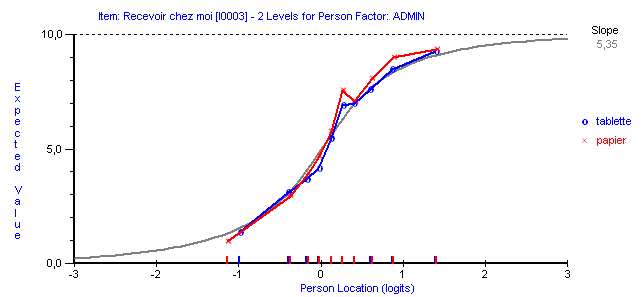


**Tablet**

**Paper**

**Item 32: Have friends whenever would like**

Figure 1S. Item characteristic curves of the three items in the social functioning dimension by form of questionnaire administration
